# Supplementary material
Source: PubMed Central journal article supplement (PMC5373981)
Supplement: NIHMS844993-supplement-01.pdf [file NIHMS844993-supplement-01.pdf]

Figure S1

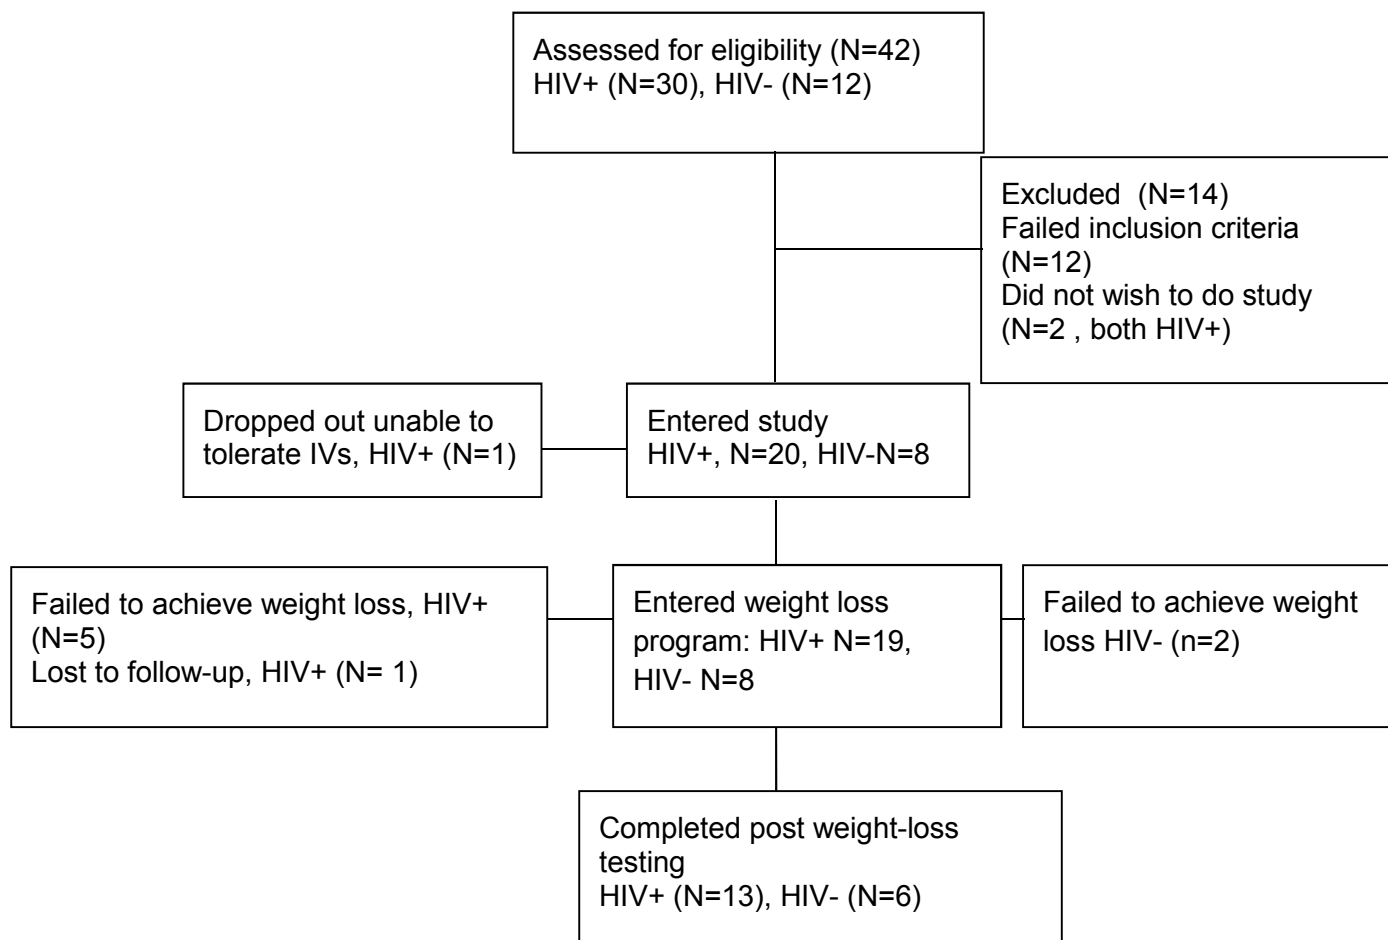

Table S1. mRNA primers

| Gene         | Accession Number | Forward                | Reverse                |
|--------------|------------------|------------------------|------------------------|
| Leptin       | NM_000230        | GTGGCTTTGGCCCTATCTT    | GCATACTGGTGAGGATCTGTTG |
| Adiponectin  | NM_001177800     | TGCTGGGAGCTGTTCTACTG   | CTCCTTTCTGCCTTGGAT     |
| IL-6         | NM_000600        | TCAATGAGGAGACTTGCCTGG  | GGGTCAGGGGTGGTTATTGC   |
| TNF $\alpha$ | NM_000594        | CCTGCTGCACTTTGGAGTGA   | GAGGGTTTGCTACAACATGGG  |
| CD11b        | NM_000632        | GTCAAGGGCACCCAGATCG    | AGAACAGCATCACACTGCCA   |
| EMR-1        | NM_001256252     | CAGCTGAGAGGATCAACTCCC  | CTGAAAAATGCCAGCACCC    |
| MCP1         | NM_002982        | TCTGTGCCTGCTGCTCATAG   | GGGCATTGATTGCATCTGGC   |
| CD11c        | NM_000887        | AGAGCTGTGATAAGCCAGTTCC | AATTCCAAAGTGAAGTGTGT   |
| MRC2         | NM_006039        | CCGAAACCGGCTATTCAACCT  | CGGTCACACTCATACATGCCC  |
| sXBP1        | NM_001079539     | GGTCTGCTGAGTCCGCAGCAGG | GGGCTTGGTATATATGTGG    |
| XBP1         | NM_001079539     | CAGACTACGTGCACCTCTGC   | CTTCTGGGTAGACCTCTGGG   |
| CHOP         | NM_001195053     | GGAGAACCAGGAAACGGAAAC  | TCTCCTTCATGCGCTGCTTT   |
| GRP78        | NM_005347        | CATCACGCCGTCCTATGTCTG  | GTCAAAGACCGTGTCTCTCG   |
| ULK1         | NM_003565        | AGACGACTTCGTTCATGGTCC  | GTGAGCTCCCACTGCACATC   |
| ATG7         | NM_001136031     | CAGAAGGGGGCTATGCCATT   | GGCTGACGGGAAGGACATTA   |
| LAL          | NM_000235        | CCCACGTTTGCACCTCATGTC  | CCCACGTTTGCACCTCATGTC  |
| TFEB         | NM_001167827     | AACCCTGAGAGGGAGTTGGAT  | GGGTCGCTGCTGTACACATT   |
| FOXO3        | NM_001455        | GCAAAGCAGACCCTCAAACCTG | GCGTGGGATTACAAAGGTG    |
| BNIP3        | NM_004052        | GCTCGCAGACACCACAAGAT   | AAAGAGGAACCTCCTTGGGGG  |

IL-6, interleukin ITGAM; TNF $\alpha$ , tumor necrosis factor  $\alpha$ ; CD11b (integrin  $\alpha$ -M); EMR1, EGR-like module-containing mucin-like hormone receptor-1 like 1; MCP1, monocyte chemoattractant protein 1, 6; ITGAX, CD11c (integrin alpha X), MRC2, mannose-receptor 2; sXBP1, spliced X-box binding protein 1; XBP1, X-box binding protein; CHOP, C/EBP homologous protein; GRP78, 78 kDa glucose-regulated protein (Bip); ATF4, activating transcription factor 4; CEBP, CCAAT enhancer-binding protein; FOXO3, forkhead box O3; lysosomal-associated membrane protein 2; ULK-1, unc-51 like autophagy activating kinase; TFEB, transcription factor EB; LAL, lysosomal acid phosphatase; ATG7, autophagy-related protein 7; BNIP BCL2/adenovirus E1B protein-interacting protein
